# Supplementary material for: Long Intergenic Non-Coding RNAs (LincRNAs) Identified by RNA-Seq in Breast Cancer
Source: PLoS One. 2014 Aug 1;9(8):e103270. doi: 10.1371/journal.pone.0103270 (PMC4118859; doi:10.1371/journal.pone.0103270)
Supplement: Table S2 — The 62 lincRNAs exclusively expressed in the cancer tissues. (XLS) [file pone.0103270.s002.xls]

## Sheet: Sheet1
Table S2. The 62 lincRNAs exclusively expressed in the cancer tissues
LincRNA_index	Chromosome	Star_Position	End_Position	Length	Strand	Read_Number	FPKM	LincRNA_Seq
lincRNA-BC37	Chr.11	85195008	85195214	206	+	414213	46540.7	TTGGCCCGGGTCTTCCAGGAGTCGGGTTGCTTGGGAATGCAGCCCAAAGCGGGTGGTAAACTCCATTTAAGGCTAAATACCGGCACGAGACCGATAGTCAACAAGTACCGTAAGGGAAAGTTGAAAAGAACTTTGAAGAGAGAGTACAAGAGGGCGTGAAACCGTTAAGAGGTAAATGGGTCAGGTCCGCGCAGTCCGCCCGGAGGA
lincRNA-BC25	Chr.X	108297347	108297836	489	+	171009	19214.5	TTCGCGAAGGCCCGCGGCGGGTGTTGATGCGATGTGATTTCTGCCCAGTGCTCTGAATGTCAAAGTGAAGAAATTCAATGAAGCGCGGGTAAACGGCAGGAGTAACTATGACTCTCTTAAGGTAGCCAAATGCCTCGTCATCTAATTAGTGAGGCGCATGAATGGATGAACGAGATTCCCACTGTCCCTACCTACTATCCAGCGAAACCACAGCCAAGGGAACGGACTTGGCGGAATCAGCGGGGAAAGAAGACTCTGTTGAGCTTGACTCTAGTCTGGCACGGTGAAGAGACGTGAGAGGTGTAGAATAAGTGGGAGGCCCCCGGCGCCCCCCGGTGTCCCCGCGAGGGGTCCAGGGCGGGGTCTGCCGGCCCTGCGGGCCGCCGGTGAAATACCACT…
lincRNA-BC166	Chr.17	33478111	33478374	263	-	95322.6	10710.4	TAGAATCCCCGCCCCGCGGTGGGGCGCGGGAAATGTGGCGTACGGAAGACCCACTCCCCGGCGCCGCTCGTGTGGGGCCCAAGTCCTTCTGATCGAGGCCCGCGACCTCAGATCAGACGTGGCGACCCGCTGAATTTAAGCATATTTGTCAGCGGAGGAAAAGAAACTAACCAGGATTCCCTCAGTAATGGCGAGTGAACAGGGAAGAGCCCAGCGCCGAATCCCCGCCCCGCGGTGGGGCGCGGGAAATGTGGCGTACGGAAA
lincRNA-BC63	Chr.5	71146739	71146941	202	+	88686.2	9964.74	CTTCCAGTGCGGTAACGTGACCGATCCCGGAGAAGCCGGCGGGAGCCCCGGGGAGAGTTCTCTTTTCTTTGTGAAGGGCAGGGCGCCCTGGAATGGGTTCGCCCCGAGAGAGGGGCCCGTGCCTTGGAAAGCGTCGCGGTTCTGGCGGCATCCGGTGAGCTCTCGCTGGCCCTTGAAAATCCGGGGGAGAGGGTGTAAATCTC
lincRNA-BC3	Chr.21	9825438	9825730	292	+	9684.15	1088.11	ATCCCGCGGCCGTGTTTTCCTGGTGGCCCGGCCGTGCCTGAGGTTTCTCCCCGAGCCGCCGCCTCTGCGGGCTCCCGGGTGCCCTTGCCCTCACGGTCCCCGGCCCTCGCCCGTCTGTGCCCTCTTCCCCGCCCGCCGCCCGCCGATCCTCTTCTTCCCCCCGAGCGGCTCACCGGCTTCACGTCCGTTGGTGGCCCCGCCTGGGACCGAACCCGGCACCGCCTCGTGGGGCGCCGCCGCCGGCCACTGATCGGCCCGGCGTCCGCGTCCCCCGGCGCGCGCCTTGGGGACCG
lincRNA-BC72	Chr.20	26189983	26190296	313	-	5499.88	617.964	GGGGGTCCTCTGACGCGGCAGGCACCCCTCGCTCTCGCCTCCTGTGGTTGTCGACTTGCGGGCGGCCCCCCTCCGCAGCGGTGGGGGTGCTGTCCCGCCGGCCCGTCGTGCTGCCCTCCCGGGGAGTTTGCGCGAGCGTTGGCTCCCCCTGGGCCTTTGCGGTGCTCCTGGAGCGCTCCGGGTTGTCCCTCAGGTTCCCGAGGCCGAGCGGTGGTGTGTCGTTCCCACCCCCAGCGCCCCCTCCTCCGGTCGGCGCCTCGGTGTCCGCGCGTGGGTCCTGAGGGAGCTCGTCGGTGTGGGGTTCGAGGCGGTTG
lincRNA-BC19	Chr.11	65194022	65211916	17894	+	4910.02	551.687	CATTTCTCGACCCCTATCACATTGCCTTCATAACGACTTTGGATGTATCTTCATATTGTAGATTTAGGTCTAGATTTGCTAGCTCCAAGTAATTAAGGCCATGTAGGAGAGCATGGTAACCACAGATAGAACTGGTATTATCCCAAGTGGTCTGCAGACTGCTGAGTGGGGATGGGATCTGCTCTCTGTTGAGAGTTGGTAATCATTGGTTTGAAATGTGATGAAACCACTCAAGCCAATGAAGGTGGGTGTGTAGGTGGGGAGTACTTTGCCATAATATTTTAAAACATTACCTGGTTAGAGTTCTAAGTGGTACTTATTTTTGTTTGGTTAGGGGAAAGCCTGAATAAAAACAGAAATGGACACATAATATGCATATTCCATAGTCTTTGGGAGGCT…
lincRNA-BC57	Chr.19	57805505	57818757	13252	+	2610.48	293.313	GTAGTTGTATTTTTAACTTTTGTTTATTTTTCATTTTTTAAAATGGGGTCTTGCTGTGTTATTCAGGCTGGTCTCAGACTCCTGGGCTCAAGCAGTCCTGCACCTCAGCCTCCTGAGTAGCTGGGACTACAGGCACACACCACCGTGCCTGGCTATAGTTTTAGATTTTTGAGGAACATTCATACTGTTTTCCATATGGCTATACTAATTAGCATTCCTACCAGCCATATATAAGAGTTCCCCCTTTTCCATGTTCTCAGCAGCATTTTTTATTTTTTATCTTTGGTAATAGCCATCCTAACTGAGGTGAAATTATATCTCATTGTGGTTTTGATTTGCATTTCCCTGATTAGTGATGTTGAGCATTTTTTCATATACTTGGCCATTTGTATGTCTCCT…
lincRNA-BC31	Chr.11	77597468	77597770	302	+	1337.27	150.255	TAATAATCGCGAAGGCCCGCGGCGGGTGTTGATGCCATGTGATTTCTGCCCAGTGCTCTGAATGTCAAAGTGAAGAAATTCAATGAAGCACGGGTAAACGGCGGGAGTAACTATGACTCTCTTAAGGTAGCCAAATGCCTTGTCATCTAATTAGTGACGCACATGAATGGATGAACGAGATTCCCACTGTCCCTACCTACTATCCAGCGAAACCACAGCCAAGGGAATGGGCTTGGCGGAATCAGCAGGGAAAGAAGACCCTGTTGAGCTTGACTCTAGTCTGGCAGGGTGAAGAGACACGAG
lincRNA-BC193	Chr.16	21445787	21457630	11843	-	847.618	95.238	TCTTTGTCACATAAAATGTGCTATGAATGTTGAGTTTTAAATACTCCAAATGAATGGCTAGAGAATTACTATTTGTAGAAATATTTATATGTCAAAGGGATGCTAACAATTTACTTTATTGCTCTAAAATAGAAAAGTTGCCAGAATGCTGTGGAGTTTTAGTGGAAAACATGATAGCTGGTGTTACTGAGTAAATTTGAGTGTTAAATGTCAATGTAAGCTAACGGCCAAGATAGGGACCACTGCAGGGTGGTTACTTGCAGCTGTGACTCAACTGGTCCTTCACTGCCAAACATACCTGGGGTTGGATCATTGGCCTGACGTTTGCAAATTGAGGAACCTTAGGGCAAATCAGTGAACTTCTGAACTGCCTTCGTCTTCAGTTATATGGGGATTTCC…
lincRNA-BC55	Chr.3	140289243	140295776	6533	+	711.841	79.9821	AGAGATGATTTGAAGAACACAGGAAGTTGTGCATAGGCTATATGCAAATACTATGCATTTTATATAAAGGAATTGAACATCTGTGGATTTTGGTGTCCGAGGGGAGTTCTGGAACCAATCCCCTACAGATACTGAGGGATGACTGTACTCAGCTCTCCTATTGTAGCATGAAAACAGACAATACGTACAACAAATGAATGTTTCAATACAACTTTATCTAGTTTCCATAAAACAATTTAAAAACACTAAAAAAGCAGGCAGTTTGGATTTATGTAATTTTCATATCTTTTTTTACCCTTTTGATTTACATTTTTAATAATTTAAAAATATAAAAACCTTCCTCAGCCCACAGGCCATACGAAAATTAGCAGCCAGCTAGATTTGGCCCAAGGCCAAAGT…
lincRNA-BC172	Chr.8	141533816	141539065	5249	-	547.666	61.5355	CACTTTTTAAAAACATTGATGTACTCCCATCCTTTTACCACTACCCTATCACATTTGACAAGTTCTTGCTGTAATGACGACGCAATTAACGAACACCAGGGGAGCGGTGGAAAGCTGCCCTCGTGTGTGAGCCCTTCGGTGACGCAAAGCCACCGTCCTGTTGTTTTGTGTGTCCTAAGCTCAGATTTTCCTGGTTTGGATAAATTTTGTAAAACTGGGCATAGCTGTACTTTTAGAAAGGGATCGTTTTCCTTAAGTTTTGGTTTTCTCTGGTTCAAGCAGTCTTTACATGCAGCCTTTTGATTGCACATCAGGGTCTCCCTTTTCTTTTCCAGATGATGTTGCTTTTCGGTGGTGGTCTCACACTCCTTTGAATGAATGTTTGCACTCTAGAACCAC…
lincRNA-BC982	Chr.11	63391936	63396302	4366	-	481.04	54.0494	TTGGAGTCTCGCTCTGTCACCAGGCTTGAGTGCAGTGGTGTGATCTTGGCTCACTGCAACCTCTGCCTGCCGGGTTCAAGCAGTTCTCCTGCCTCAGCCTCCCAAGTAGCTGGGACTACAGGTGTACGCCACCATACCCAGCTAATTTTTTTGTATTTTTAGTAGAGATGGGGTTTCACCATGTTGGCCAGGATGGTCTTGGTCTCTTGACCTTGTGATCCGCCTGCCCGCCTTGGCCTCCCAAAGTGCTGGGATTACAGGCGTGAGCCACCGTGCCCGGCCAAGAAGGATTCCTTTTTTAAAAGTTTACAGAACTTGGAGAAACTTCAGAACTAAAGACTAACTGAAAATGATGTCATTACACTCAAAAAAAATTTACAATAGGGAATCCTGTTGCCA…
lincRNA-BC51	Chr.17	55757313	55761232	3919	+	462.012	51.9115	TTTTTTTTTGCTTGTTTTGGTTCTGTTCTCACTTTTAAAGGATGCTGAGATGGTAATATGACTCTCCATATTTTGGTACCAATTCTGAGACTGTATGAATTTTCAGGTGGAACTTTAGCACACACTGAAGCAAAGTTGTGAAGTGCAGGGCGGGAGGTGGGCGTGAGCTTTCTATTTTGCGTTGTAGAAGAAGTGAGATGTAGTAAGCTAATTAACAGACTTTCTAGCAGTTCTTTTTGTGATGTCTCTTTGTTAATCTGAGTCTATCTATTTTCGGCAATAAGGTAAGGACGACAGTGTTTTGAGTGTCCTCCTTTTCTATAAGTGCTTTTTTTCTGTTGAAAGAGGTGATATTATAAGGTTTTTTGAAATTGTGAATTCTAAAAAAGAAATGTTGTA…
lincRNA-BC105	Chr.17	77908126	77913802	5676	-	456.86	51.3325	GTGTGTCCCTGCGTGCATGCATGCATGCACACGTGCGTGCGTGTTTGTGTTTGCAAGATCCTCTGACAATGATCTGCTTTGTCCCAGGGACGTGGTAGTGTATTAGCTGACCAACCAAGACAAGGACACCTGGAAATAGTTAGACTCTTCCACTTCCCTTCAGGACCTGTGAACTCAGATATGTAAGTCAGCTTCTCAGGTGGTCGGACGTGAGAGCGACCACAGTGAAGGAGCCAGCACTCAGGGCTCTCTGCCTTCTATGTGGGAATGAGGTCTTCCCAACAGACTCTCCCTCTTCCAAAAGATTGTGTATCAGTTGCTCCTTCTGGGATTTAGAGATGGACAGAAAAGGGTGTGCGATCTATGCTGTGAGAACTCCCAGCCAGCTTAGAAGTGTCG…
lincRNA-BC134	Chr.11	2421093	2425700	4607	-	423.518	47.5863	TTTGGGGCTCAGGTGACTGGCTCCTGGAAGACAGGGCTGGGCATCCACTGCATCTGTCAGCTGTCCCCCTGACACCCGATGGCCAGTACAGCACACACTGGTGTTTATGGCCCCAAGACAAAGCCCCTGCTGGCACCAGTGGCTGCTTTATCTTCAGTGGAGCCTGGAAAACACTGTACCCCACGTGGCCCAGATAAAACTGGACCCCAGGCTCAAACACCTGCCCAGGCCCCCCAACTGCCCACTCACCCCAGCCTCCTCTGTCCACACCCATTTTGTCATCTCCCTTTCGCTTCCCAAGCTGTGGTCTGCACTAGGCCTGGGGCTGATGGCATCATGTGGGCTTTGGTTGGGGGAGGGCAGATTCTGTACCCACTCAGGCCCATTGAGGGCACTCAC…
lincRNA-BC76	Chr.4	132655709	132658864	3155	+	422.566	47.4793	GGAGGGAGGCAGTGGACTCATGGGTCAGTGCCGTTGCAGACGACAGCACGCCTTGCGGCCCTGGGGATCTTTCCGTGCCCCGGCGAGACCCTTTCCGCCTCACTGCATAGTGACCTCATTCCCGATCAGCCGGTGGGAGCCATCATCGGATCCCAAGAGGAGTCCGCGCAGCCCAGCCAGCACCCCGAAGGTCCTCCTTCACCGGGAACAGAAGCAGGAGACCGATCAAGGAGGTCCTGACGACAGGACTCCTATGGGTCCGACCCTGGGTCTCCCGCAGGCCCCTCTGGTAGTCCTCTTCCCACCCGCCGCCTCGGGCTGCGCCGCAGCCGCCGCCGCCGCAACGTCCAGCACCGCCGCCCCAGTCCCCGCAGCCGCCGCGTCGCCGCCATTTTTTAA…
lincRNA-BC86	Chr.3	149002565	149003846	1281	+	421.651	47.3765	GGCAACCTGCTTGGGTCCCTTTCCACACCGCGGAAGCTTTGTTCTTTTGCTCTTTGCAATAAATCTTGCTGCTGCTCACTCTTTGGGTCCACACTGCCTTTATGAGCTGTAACACCGCGAAGGTCCACAGCTTCACTCCTGAGCCAGCGAGACCACGAACCCCACCAGAAGGAAGAATCTGTGAACACATCCGAACATCAGAAGGAACAAACTCTAGACATGCCGCCTTTAAGAACTGCAACACTCACTGCGAGTGTCCGCGGCTTCATTCTTGAAGTCAGTGAGACGAAGAACCCACCAATTCCAGACACATTTTGGCGACCTAGATGGGACAATCGCCTATCACCGAGTGGTGAGACCATCGCCTATAGCTGAGCGGCGAGACAATCACCTATCGCC…
lincRNA-BC97	Chr.1	145289992	145293354	3362	+	412.267	46.3222	TCCCCAAACTGACTGCACATCTGAGTCATGTTAACAAACACATTCCAGGCCCCACCTGAGCCCTCTGAATCAGAATCCCTGTAAGGAGGATGATGAACTTGAATTTGCACTGACTTTCCCAGCTGTTTCTTACTCTGATCAACTTGGGGGTAGGACCCATTGAGCTGCATCACATCATTCCAAAGCCAAAACACAACAGCAGGACAAGAATATTTTCAAGGCAGTCTCTAAAGCAGAGGAGAAACTGTTGAGGGAACTTAGAAGTAAAGGAGATCTGGCTTGCTGGGCTCCATTTGAACTTTGAGTACAACAGAGACATGAGCCCTTCGGGACACATGCCTGAGGTAGTGACAATCCAACTTTGGAAGAGTGGAAGCCCTAGTTTCAAATTCAAGCATG…
lincRNA-BC17	Chr.8	37556568	37557495	927	+	408.849	45.9381	GTTGGGGTCTTTGGGTTCTTCTAGACGTTTTGTTTTCCCTTCCTGGGGAGTTTCTTGCATGAGTCTTAACTTAAAACTACGTTTCCGCCTTCTCTTTTTCCCTCTTCCCCCTTCATTCCCTCTTGTTTCCTTCCATTTGCGGTTCTGTTTTTGTTTTTTGTTTTGTTTTGTTTTGTTTTTTCCTTTGTTGTACAAGTAACAGAGAGGAGGTTTTTTTTGTAACTCATTTTGGGGGTGGAGGGGGCCACCTGGGTGGCAGGGGCCCTGGAGCTCTATTGACCTGGTACACTGCTCCGGGACTCCTCCCCCGCCACCCTCCGCGCATAGGGTCCTTGGTCTGGACCCTGCCCCCCAAAAGTAGGGCCTTGCTCCTCTACCTTGCTCTGAGCACGGAGAGCC…
lincRNA-BC40	Chr.13	110076483	110076721	238	-	342.083	38.4363	AGTTGTAAAAAACTCCAGTTGATACAAAATAAACTACGAAAGTGGCTTTAACATATCTGAACACACAATAGCTAAGACCCAAACTGGGATTAGATACCCCACTATGCTTAGCCCTAAACCTCAACAGTTAAATCAACAAAACTGCTCGCCAGAACACTACGAGCCACAGCTTAAAACTCAAAGGACCTGGCGGTGCTTCATATCCCTCTAGAGGAGCCTGTTCTGTAATCGATAAACCC
lincRNA-BC51	Chr.2	92322440	92326052	3612	+	326.05	36.6348	TGGGATGTTTCAATTGAAGTCACAGTGTTGAACAGTCCCTTTCATAGAGCAGGTTTGAAACACTCTTTTTGTAGTATCTGGAAGTGGACATTTGGAGCGCTCTCAGGACTACGGTGAAAAAGGAAATATCTTCCAATAAAAGCTACATAGAAGCAATGTCAGAAACTTTTTCATGATGTATCTACTCAGCTAACAGAGTTGAACCTTTCTTTTCAGAGAGCAGTTTAGAAACACTCTTTTTATGGAATCTGCAAGTGGATATTTGTCTAGCTTTCAGGATTTCGTTGGAAACGGGATTACATATAAAAAGCAGACAGCAGCATTCCCAGAAACTTCTTTGTGATGTTTGCATTCAAGTCACAGAGTTGAACATTCCCTTTCATAGAGCAGGTTTGAAAC…
lincRNA-BC186	Chr.3	123210895	123213340	2445	-	289.851	32.5676	AGTTATGTTTCAGTCTGCAGTGTGTTTAGCATTCCCTTGTCAAAGTGCTTGACTGCATGCTGGAAACTTTGTATTTTTGAAGCGGCAAACTCTGTTCTCTGGAATGCTCTGAAGTTATGGCTGGGACCTATCCCCTCACATCTAATGAATGAATTATAAAATGTATATGTCTATGAAGCTTCGGGGTAGTGCCTGTAATCAGAAAACAACTTAGAACCCTTTTGTTTGTTTCCAATTGAGTCATTACTGCCTGCCACTAAGAAACGTGCTTGAATCTAATAAGTATGTGTGTACCGTAAAGAATATATCTTATCTGGAGCTCAGCCTCAATCATGTCTTAACAAAATGACAGGTCTCAGAAAGGGGGAGCTCAATAGCTCAAAAGTGACAAGTCCTTTT…
lincRNA-BC70	Chr.4	132670485	132673824	3339	+	277.987	31.2345	GTTTGGTCACACGGGCTCCAGCTCGGACTCGCCTCTGTCTGTCTTTGCCGGTGTCGCCGGAAGCTGCGTTGGGATGCCGGAGCCCCCGGGCCTTGGAGATGAAGGCAGGTCCCTGCTCCCCCCAGGAAGGACGGAGGCAGTGGGCTCATGGGTCAGTGCGGTTGCAGACGACAGCACGCCTTGCGGCCCTGGGGATCTTTCCGTGCCCCGGCGAGACCCTTTCCGCCTCACTGCATAGTGACCTCATTCCCGATCAGCCGGTGGGAGCCATCATCGGATCCCAAGAGGTGTCCGCGCAGCCCAGCCAGCACCCCGAAGGTCCTCCTTCACCGGGAACAGAAGCAGGAGACCGATCAAGGAGGTCCTGACGACAGGACTCCTATGGGTCCGACCCTGGGT…
lincRNA-BC99	Chr.1	145285953	145287552	1599	+	267.313	30.0351	GAACTATTAGAAATAACTCCCTCTTGCATTTTCACACATGGGGAATGTGATGTTCTCTTGGGTATTATGCTAATCATATTTTGGCAGGTTTCTCTGGAGCAGATGCAGAAATGATCATACCACTTTCCAGGGTGTATTATTTTAGCTCCTTTGACTTGGGCCCTAAGTCTGTTTTACCTGATGTTCCTGAAAGATGTTCCTGATGTCCTTCACTGTTCTTTCATGCTGGATGTTCTTGCCTATGCTGCCTCCTCAGCTATCACCCTCTCTTCCCCTTTTTAATGTAGAACTCATTCTTAATGATTTGTCAAAGGCACCCTATTTCACTGAAATGCCTTCTATATTCCCTACCCTCCAAGTGGATTGTAGACCTTCTAAGGTCTTTTGACATCTGCATAT…
lincRNA-BC4	Chr.9	35753270	35757254	3984	+	261.434	29.3746	CTGGGACCTGGGGAACCAAGGATAGGGGAAGGAGTCAGCACAGTGAAAGGCTGCCTTTATCCCTGCCCACATGTTCCCTCTCTCACAGTTTTCCCCCCACAGAGCCCCTTTCAGTGGCCCCTTGGTCCTCCTAACTAAGCTGTCACCTACCATATGTGGGCCTTTTTGTTTTATAACAGGAGTATTTTCTCTCCAGGTCCACCCCAACCTCCCCTGATTTATAGCCTGAAGCCTTATCTTTCACACTAGTGTTGGTCCCTTCAGGTTTGGCCCATCTTGTATTGCTCTTCTGTTCATTCTTACATCACAGCAATCTAGTCACTCCCTGGTCATCCCTCAGTCACTCATATCAGAGTCATTCTCTCTGGCCATCTTTGGTCACTCACGTGTCACAGCAGC…
lincRNA-BC55	Chr.17	56167647	56170472	2825	+	242.144	27.2072	GGGGCAGGACAGTGTGGAATCTCTAGGGTGTATGGGTAGGTAGGGGGCACAGTTAGTTCTAAGTGGGCTTTTATGCTAAAAGCCTCTGGGGATATCTGTTTTGAAAATAAAGATAGGTGTCCCCTCCTTGCTGTCATCTAGCCCAGACACTCTGCTTGCTCTCTGGCTGTCTGCTCCCTGGGAAGGCTTTAGGAGGACCACCCAGGACAGGATGACCATGCTGCCATCTGCTCTGGAGCTGGGTCTCAGTGCAGAGGGACAGTGACTGTGGATGGTTGCAGTCTCTGGTGGGAGGTGAGGATAGAAGTGATAAAGAGCTAAGAGGAGCTTCTGGGAGCCTTGGAGGAGGTCAGTCTTGCAGTGGTGAAGCCAGGACATAGGAGATGGAGCAGGGCTGTG…
lincRNA-BC1	Chr.1	143283184	143284202	1018	+	235.938	26.5099	CTGGCCTGTACTCAGATCTTCGCGGAGCGGATCAGCGGCCGGAGCGTTTGGCGGACTCTGCGTGGACTTGGAGCTCACAGCGTCTTGCGACTTGGAAGCGGATTCAGAGGACAGGACAGAACACTTGGGCAAGTGAATCTCTGTCTGTCTGTCTGTCTGTCTGTCTCATTGGTTGGTTGATTTCCATTTTCTTAAGGGGCACATACCTCACACCGCACACACACAAACACACACCGCACACACAAACACACACACACACACACGCGCACACACACACTCCTTCCTTCTGCGAGTTAGAAAATTGGTACGGGCCCCTGGGAGCTGCAGGTTTCCTAATCATGTCTGCACCTAAGAACAGTAGGGTCTTGTCTGGCTCTTCTTATGAACGGTCCCCCAGCT…
lincRNA-BC56	Chr.3	140286927	140288708	1781	+	222.625	25.014	TCAGAGTCATTCAAAAGTATAGACAAGACCAGTCTCCCCAACTTCCACTCCTGGTGCAGGATTCTACTTATGTTCATAGGTATGCACCTAACAGACACTGCTGCAAACCTACTATGTGCTAAGCATCCTACCAATAGCTGTGAGAAAAAGAAAAGCTGAATAAGATAAGCTCCTTCCCTACATTATATTTGCAGACGGGAAATAAACAGGCCTAGAAATTACACAAGAGACAAATGAAGAGGAAGAGAAGTCACAAGAGAAGAAGGATGCGGTCACAAACTTAACCAGTGCTCTTATTTTTCCCTTCTCAGGGAAAAACACCAGAAGAAGCTGGGGTTTTATATTCATTGGATGGAAACAGATATTTCTCCTGGGAATTCTCCCAACCAAATAGCCCTT…
lincRNA-BC24	Chr.10	20570961	20574762	3801	+	215.563	24.2206	CAATTGATTCAAAACAATTTTGAATCAATTTTCTATTTTGATTCAAAACAATTGATAATTCTGTAAAAAAACATAAACACTGAATTCTTCAGTGAACCAAAGCAACAAATAATAGAGAAAACTTCTTGAAACTGGAGTGTGGGAAAACTTCTTAACAGAACTAAGAGTTAAAGGTAGTGAGAAGTGTGTGGTGTGTGAATTCTTTAGTGGTAAGGGGAAATGTGGGCTAAATCCTTTTCTTTCATGAAACTCTCATTCTATTTTATATTTCTGGTTTGTTCTTGTTCCCATGTGAGAAAACATACAGTTTCTGAAAATTCAAAATGGTCATCAATGCTTTGGACTTTACATAATTATGTATTAGAGAAGGTGCAACTGTACATTACTTAATATACTATG…
lincRNA-BC136	Chr.11	2229626	2232069	2443	-	171.52	19.2719	GCTGCCTGCAACCTTGTCCCTGTACCTCGGGCCTCCACCACATCCCTGGACCTGCACGAAGGAGCCCTGAGCATGGAAGTCAGGGGAAGGGAGGTCTCGACATGAGCCCAGCCATGGCCAGAGTACTGAGCCCAGGGCCAGCAGCCTCGGCTGGCAGTGCAGGGTGATGGGTCTGTGGGCCGGGCTGCCCAGGGACCTCGGCCCTGGGGTCTGAGGGGCACCAATGCCTTTTGCAGGCCACCATTTCCCTTTCCACTTTCCAAATGTGATTGGACACAGGTGGATGCACCTGCCTGCCCAGCAGACAGCCCGGTTCTGACCCGTGTGGAGCTGCGTGGACTGGGCTCACCTGTGCCTTCTTGCATCAACCAGGTGTGGACCCTGACAAGGTGCCAGCCA…
lincRNA-BC173	Chr.8	141539715	141541201	1486	-	168.676	18.9524	GTTTGGCATATCAAGAGTGTTTTGGAGCCTGGAGATGGGACCGCCTCTCAGTTCTTAGTGCTTAAGGACAGGAATATGCAATTGACTTAATGTGACAGCAACCCGCTTCCCCCGTGGAGACTGTGCAGCGTGTACCCATGGGAGGGACGGATGTGCCCTCCGCGCCGCTCGCCACCCTCCCTGCCGCCTCATCCCCGTGTGTCACTCACTCAGCTGATGAAGCACAAGTGGAAATTATTTATTCTTGCATTGCTGGGAAACATTGATGTGTGGGGACTCACTCCTCTCCGTGTGCTCTTTTGTCAGATGACTTCCATAGATCTATGCACTGAGATTCGTAGAAAGCTGTTGGTGGTGGCTCTGCTGGGCGTGAGGCCGTCGGTCACAGCGAAGGAGCTT…
lincRNA-BC15	Chr.12	13066678	13068589	1911	+	168.132	18.8912	CTTTGGGTTTGTACTTGACCCTTCTTCATGTGTCTCTCCCGTTCCCTCTAAAACAAGTGTGTTTCCCCTCATTTTTGAGGCTGTCAATGGTGTGAGAGCCAGGATCATCACGGGGCCTGAGGTTTTACTCCAGAAAAGCAGAGGAGTGGCAACCTTGGCTTGGGGTTTGGCAGCCCAGGAAAGGCAGGGAGGAGAGCTCAAAGCCGGTTTCATGTTTCACCCAAGGTCTAATTGTGGGAGAGGACAAATCCAGATCCCCTGTTTGACAGAATTAGTTCACAAATGTCTCTTGGCAAAAACATGTGACACCTAACCATGATAATTGACTTAATCCAAGAAAGAGCTCTGTAGGGCAGAGCAATAGGAAATCTCTCTTTCGTTATGGAAAAAAAATAATCC…
lincRNA-BC59	Chr.2	92290884	92291626	742	+	166.316	18.6872	TTGGAGCGCTTTCAGGCCTATGGTGAAAAAGGAAATATCTTCCCCTGAAAACTAGACAGAAGCATTCTCAGAAACTTATTTGTGATGTGTGCCCTCAACTAACAATGTTGAACCTTTCTTTTGATAGAGCAGTTTTGAAACACTATTTTGTTAAATCTGCAAGAGGATATTTGGATAGCTTTGAGGATTTCGTTGGAAACGGGATTGTCTTCATATAAACTCTAGACAGAAGCATTCTCAGAAATTTCTTTGGGATGTTTCAATTGAAGTCACAGTGTTGAACATTCCCTTTGTTAGAGCAGGTTTGAAACACTCTTCTTGTAGTATCTGGAAGTGGACATTTGGAGCGCTCTCAGGACTACCGTGAAAAAGGAAATATCTTCCAATGAAAGCTAGATA…
lincRNA-BC97	Chr.5	151184949	151186959	2010	+	164.578	18.4919	GTGTTATTTGTTGAGTGCTGTGTGTGAGATGGGTGAAGGTTTTGTTTACACGTGTGAAACAAACTTTTGTGTGATTGTCATTACTAATTGAAGGGCAACCAGGTTGTAAAATTCAGCGTATTTATTTTCTTAACAGTATTCATCTTTAGGACTGTCGTTTGAGGATAGCATAGGAATATTTGGTTTGCATTACTGAGAAACTCTAGGTTTGCTGTGATGGTTAAGACCACAGTGAAGTTGGTATTACCAGTTTGGTTCCAGTTCCTCAAATATTTGAAAATTGGCAGCATCTCCTTTACATAAACTTAATGTAACTGAATCACATGGCTTTTTTGTAGGGTTAAAGTAACTTTGGTAACCACTTTTGGCCCAGATCACTGATAATAGGAAGAAATACAA…
lincRNA-BC91	Chr.4	162306983	162308377	1394	+	162.334	18.2397	ATGAAGAGAGAGTCCTTGGAAGGTGTCATCAGGTATTGACCAAACAAGCCACTGTCCTGGATTTGCCTGTTTTTCCGGTTCCAAGGCCATTCTTCTGCCTTGAGTGGTTCCTTGAGACTCTTTATCATCTTGACCTTCCCAGAAGAGAGCTCCACAAAGAGCACATCAGTTTGTGTGCTTGAACTACCGTAGATGTTATATTGGTGGGCTTCAGTAAAGGATGGTTGAAATGCCAGATCAGATATGTGCAGATTTGTGTAAATATCAAAAGCCTCCTGTATTTCTCCTCTGATGGTAATGTACTGAACCCTTACAAGACCTTTCACATCATTAATGCTGACAAGGTAGTGGCCATCTGGAGAGACATATGGAGTGCCCGTCACATCACTATTGAACCCA…
lincRNA-BC55	Chr.10	42384965	42386084	1119	+	157.769	17.7269	GGATGGACTCATCATCGAATGGATTCGAATGGAATCATCGAATGAAATTGATTGAAATCATCATCAAATGGAATCGAATGGCATCATTGAATGGAATCGAATGGAATCATCATCAGATGGAAATGAATGGAATCATCACTGAATGGAATCGAATGGATTCATTGAATGGAATCAGATGGGATCATCGAATGGACTTGAATGGAATCATTGAATGGACTCGAAAGGAATCATTATTGAATGGAATTGAATGGAATCATCGAATGGTCTCGAATGGAATCATTATCAAATGGAATCGAATGGAATCACCGAATAGAATCGAATGGAACAATCATCGAATGGACTCAAATGGAATTATCCTCAAATGGAATCGAAGGGAATTATCTAATGCAATCGAATAGA…
lincRNA-BC94	Chr.21	11094575	11096639	2064	-	151.886	17.0659	ACTGAGGCAGGGAGAATTGCTTGAACCCGGGAGGTGGAGGTTGCAGTGAGCAGAGATGGTGCCATTGCACTCCAGCCTGGGTGACAGAGGGAGACTCTGTCTCAAAAACAAAACAAAACAAAACAAAACTTAAAAATGGTTAGGCACTGTGGCTCATGCCTGTAATTCCAGTACTTTGGGAGGCCAAGACAGGAGGATCACTTGAGCACAGGAGTTCGAGACTAGTCTGCTGGGCAGCATAGTGAGACACTGTCTCTAACTGGGGGGAGGAAAAAAAAAGCCAGGTGTGCGGCCACGTGCCTATAGTCCCAGCTACTCGGGAGGCAAGATGGGAGGATTACTTGAGCCCAAAAGGTTGAGATTGCAGTGAGCCATGGTTGCGCCACTGCACTCCAGCCA…
lincRNA-BC131	Chr.1	168218333	168220501	2168	+	151.6	17.0337	TTAGTTATTTCTTGTCTTCTGCTAGCTTTTGAATTTGTTTGCTCTTGCTTCTCTAGGTCTTTTAATTGTGATGTTAGGGTGTTGATTTTAGATCTTTCCTGCTTTCTCTTGTGGGCATTTAGTGCTATAAATTTCCCTCTACACACTGCTTTAATTTTGAAATGGAGTTTTGCTCAGTTTCCCAGGCTAGAGTGCGGTGGCATGATCTCAGCTCACTGCAACCTCTGCCTTCTGGGTTCAAGTGATTCTTGTGCCTCAGCCTCCCAAGAAACTGGGACTACAGGCATGTGCCACCACACCCGGCTAATTTTTGTATTTTTAGTAGAAACAGGGTTTCACCATGTTGGCCAGGCTGGTCTCGAACTCCTGACCTCAAGTGATCCTCCTGCCTCGGCCTCC…
lincRNA-BC132	Chr.1	168215660	168217613	1953	+	147.754	16.6016	TTCATTTGACACCGTTTGGTTTAGCTCTCTTTGTATGTGTTCAAAAACCAAAGCGTTTTCTTTCAGAGCCTCTCTTGTGTTATGGAGCTCAGTTTTGAGGCACCTGGACTTACTCTCAGCTTTAGAAAGTTGCTGAGAAAGAATCAGAACATGAGAATTCAAATTTTCCTGTAAATGACGCAATTTATCTACTGTGCCCTGGAAATCAAGCTCTTGGTCTCTTTCTGTTGAGTGACTTTGATCATGATCATGTAGAGCAACATTCAGTCTACGATGGTATGATTCCATTTCGTCAGTCTTTGCCTGCTTTGTTTTTCCTTCTCCAGTTTAGAACGGAGCATTGTGTTCTCATCTGTCAGAGCAGTAAGCTGTCCACTATAATGGGCTATCGTTTTTGTT…
lincRNA-BC178	Chr.1	245011532	245013546	2014	-	140.98	15.8404	ATTAGAATAAGCCCTTGAGAATTTGGAAGTGAGCTATACTACTAATGTAGTATATATCTCTTGAGTGTGTTGGAGTAGATGAAAAACCAGGGGTCCCCAAGGGTATATTTTTGAAATTGAACAGAAACAATTCATCTTAATATTTAGTTTTCATTATGTTTAGCTTAATATGTGTGCTAGTTTATTTGGCGTCACACTTATGTCAATCTCAAGTCATGCAGAAATAGCACAGTCTCAGAAAAGAGGTTAGGTGGGAAATAGATGATATGCTTACATTATTGAGCAGGACTATGCTTTCACATCCTAACCAATTGACTAAAAATATAAATGATTGAAGTAATTTTCATTAGTTGCCCCAGGAGTCTTTAATAATAGTTTTAAGGGATAGTAGATTGGACA…
lincRNA-BC401	Chr.4	49514932	49517112	2180	+	137.447	15.4435	GGACTTGGAGCTCACGGCGTCTTGCGACTTGGAAGCGGATTCAGAGGACAGGACAGAACACTTGGGCAAGTGAATCTCTGTCTGTCTGTCTGTCTGTCTGTCTGTCTGTCTGTGTGTCTGTCTCATTGGTTGGTTGATTTCCATTTTCTTAAGGGGCACATACCTCACACCGCACACACACAGACACACACACGCACACACACGCACACACTCACACCCACGCACACACACTCCTTCCTTCTGCGAGTTAGAAAATTAGTAGGGGCCCCTGGGAGCTGCAGGTTTCCTAATCATGTCTGCACCTAAGAACAGTAGGGTCTTGTCTGGCTCTTCTTATGAACGGTCCCCCAGCCCGGACTCCCCAAGGTCCATGCGAGCCTCACCCAGCTTCTCCCTCTC…
lincRNA-BC183	Chr.1	236260415	236260722	307	-	127.136	14.2849	AGTTAACGTCTATTCCCCTGGTCACCTGCTCCATTCTGAGTCACCCCTGGTCACCTGCTCCATTCTGAGTCACCCCTGGTCGCCTGCTCCATTCTGAGTCACCCCTGGCCACCTGCTCCATTCTGAGTCACCCCTGGCCACCTGCTCCATTCTGAGTCACCCCTGGCCGCCTGCTCCATTCTGAGTCACCCCTGGCCGCCTGCTCCATTCTGAGTCACCCCTGGCCGCCTGCTCCATTCTGAGTCACCCCTGGCCGCCTGCTCCATTCTGAGTCACCCCTGGCCACCTGCTCCATTCTGAGTCACCCC
lincRNA-BC19	Chr.14	24774426	24776676	2250	+	124.495	13.9882	GTTTTTGTTAGTTTGAGGGGAAGGGTATGAAGACAGATCTCAAGGTAAAGTCAGAGAGGGCTGTCATCAGTATGCTGGGGAGTTTAGGGACAGGAGGCATTGGTAGGGGATTAGATGTAGCAGCAGTCAGGCTGGGATCAAGATGCCTGGGGGACATCTTGATCTTGGCCTTTCAGGGCAAGTGGGAGGCCAGAAAGGTGGCTAGGAAAGAACAGCATTCTTCAGGTAAGGGTATAGACTTGGGATGTGAGGCGTTATGCTGAAAGGTTCTGTCACGAGGGGATCAGAGGACAGTGGGGAAATTGGGTGGGTTATCTAGCCTGTACTGTCTGCAGGTCCTGAAATTTGATGCTGTCATAGTCTTTGCAGTGGGTCGGTTGGAATGATTCTGGGGGCAGA…
lincRNA-BC58	Chr.2	92297344	92298162	818	+	124.398	13.9773	TGTGGACATTTGGAGCGCTTTCAGGCCTATGGTGAAAAAGGAAATATCTTCCCCTGAAAACTAGACAGAAGCATTCTCAGAAACTTATTTGTGATGTGCGCCCTCAAGTAACAGTGTTGAACCTTTCTTTTGATAGAGCAGTTTTGAAACACTCTTTTTGTAAAATCTGCAAGAGGATATTTGGATAGCTTTGAGGATTTCGTTGGAAACGGGATTGTCTTCATATAAACTCTAGACAGAAGCATTCTCATAAATTTCTTTGGGATGTTTTAATTGAAGTCACAGTGTTGAACATTCCCTGTCATAGAGCAGGTTTGAAACACTCTTCTTGTAGTATCTGGAAGTGGACATTTGGAGCGCTCTCAGGACTACAGTGAAAAAGGAAATATCTTCCAATAA…
lincRNA-BC89	Chr.21	11078739	11080565	1826	-	122.763	13.7936	TAGCTCACTGCAGCCTTGAACTCCTGGGGTCAAGTGATCCTCTAGCTCAAGTGATCCTCCTACTTCAGCCTCTGAGTAGCTGGGACTCTATGTGTGCACCACCACGCCTGGCTCCTTTGCCCATTTTTGTTTGTTTTTTGGAGACAGAGTCTTACTCTTGTCACCTAGGCTGGAGTGCAGTGGCATGATCTCGGCTCACTGCAACCTCCACTTTCTGGGTTCAGGCGATTGTCCTGCCTCAGCCTCCTGAGTAGCTGAGACTACAGGCGTGCACCACCATGCCTGGATAATTTTTGTGTTCTTAGTAGAGACGGGATTTTGCCATGTTGGCCAGGCTGGTCTTGAACTCCTGACCTCAGGTGATCCACCCGCCTTGGCCTCTGAAAGTGCTGGGATTAT…
lincRNA-BC90	Chr.21	11084216	11085291	1075	-	120.198	13.5054	TTTTCAGGCAGAGGGAGCAGCATTTGCAAAGGCTCTGAGATGTGAGAGTTTGTTACTGAAGAAATTTGGTAGGGCTGGAAGCTCAGTGAGCTTGGTGCGAGAGAGTCAAGAGATGAGGCTTTAGAGATAGTATGGGTTTTAAGTCATTCCAAGGAATAGTTTTGATTTAACTCTGAAGGCCATGGAGAGACATTGAAAGGTTTTATCCAAGTGAATGATGGAAGGAGCAAACTGTGGAACCCTTGGGGCAGCACTGAGAAGAGCGACTCATGATGCCCCTTTTCTGAACTGCTTATACAGATTTGATTCTCATTCTTGGCATTACTCCTGATTCCTCCTTCGTCTACATGCACACGCACCTACACACACACACAAACACACACAGAGACACACGTCTGC…
lincRNA-BC53	Chr.2	92318255	92319477	1222	+	120.062	13.4901	TTTTGTAAAATCTGCAAGAGGATATTTGGATAGCTTTGAGGATTTCGTTGGAAACGGGATTGTCTTCATATAAACTCTAGACAGAAGCATTCTCAGAAGCTTCATTGGGATGTTTCAATTGAAGTCACAGAGTTGAACATTCCCTTTCATAGAGCAGGTTTGAAACACTCTTTTTGTAGTATCTGGATGTGGACATTTGGAGCGCTTTCAGGCCTGAGGTGAAAAAGGAAATATCTTCCCCTGAAAACTAGACAGAAGCATTCTCAGAAACTTATTTTTGATGTGCGCCCTCAACTAACAGTGTTGAAGCTTTCTTTTGATAGAGCAGTTTTGAAACTCTCTTTTTGTGGAATCTGCAAGTGGATATTTGTCTAGCTTTGAGGATTTCGTTGGAAACGG…
lincRNA-BC56	Chr.2	92307205	92307488	283	+	117.256	13.1748	GGTTTGAAACACTCTTTTTGTAGTATCTGGAAGTGGACATTTGGAGCGCTCTCAGGACTACAGTGAAAAAGGAAATATCTTCCAATAAAAGCTAGATAGAAGCAATGTCAGAAACTTTTTCATGATGTATCTACTCAGCTAACAGAGTTGAACCTTTCTTTTGAGAGAGCAGTTTTGAAACACTCTTTTTGTGGAATCTGCAAGTGGATATTTGTCTAGCTTTGAGGATTTCGTTGGAAACGGGATTACATATAAAAAGCAGACAGCAGCATTCCCAGAAACTT
lincRNA-BC161	Chr.19	9671137	9673256	2119	-	110.448	12.4099	AGAGTGGCCAGTTGGTGGAGCAGTGAGAACATAGCATTTGTTAAGTTTGCTGTCTTCGAAGGTTGTGGTTTGTGGTACCCCAAAACAATTAAAATAGGAACATCAAAGATCACAGAGCAGCCGGGCACGGTGGCTCACACCTGTAATCCCAGCACCTTGAGAGGCTGAGGTGAGTGAATCATGAGGTCAGGAGTTCGAGACCAGCCTGGCCACCATGGTGAAACCCCGTCTCTACTAAAAATACAAAAAATTAGCCGGGCATGGTGGCAGGCACCTATAGTCCCAGCTATTCAGGAGGCTGAGGCAGGAGAATCACTTGAATCCAGGAGGTGGAGGTTAGAGTGAGCTGAGATCACACCACTGCACTCCAGCCCAGGTGACAGAGTGAGATTCCTTCTC…
lincRNA-BC253	Chr.2	130828916	130830983	2067	-	106.738	11.9931	TGAATTCTCATTTATCTCACCTAAAAGAGAACAGATTCTTTCTCAACAAGTCTAATGAAGACAGTAAAATCAACAGGCTAAAAATTAAGCTCCACGAAACAAGATAAAACTCTGAGAGAAAAGACGGGGCAGGCCGCCATCTTTCCCGTTCAGGCAACGTAGTCATTCCAGCCTGCGGGCTTTGGAGAGTACAAACCGACGAGGGACAGAAGAGATCCCACAGCACAGCATAGCTGCTTTACCAAATCATGGCCAGACTGCTTCTGTAAGCAGGCCCCTGATCCTGTTCCACCTCACTGGACAGGACCTCCCAACTGGGGCCTCCAGCTACCCCCACCAGCATTCCTTGGCCAATGGAAATGTGAAATGTTCCTGGGACAGAGCTCCCGGAGAGGGGCA…
lincRNA-BC110	Chr.6	58778425	58779260	835	-	106.632	11.9812	CGGTCCAATTATCCACTTGCAGATTCTACAGAAAGAGTGTTTCAAAACTGCTCTATCAAGAGAAATGTTCCACCGTGTGTGTGGAATGCAGCCATCACACAGTAGTTTCTGAGATTGCTTCCGTCTAGGTTTTATGGGAAGATATTTCCTTTTCTACCATAGGCTTCAAGGCGCTCTAATATCCGCTTGGAAATACTACAACCACAGCGTTTCAAACTGCTCTATCCAAAGGAAGGTTCCACTCTGTGACTTGAGTGCACACAACCAAAGAAATTTCGGAGAATTCTTCTGTCTAGATTTATACGAAGAAATCCCGTTTCCAACGAAGACCCAAAGGAGGTCCAAATATCCACTTGCAGATCCTTCAGAAAGAGGGTTTCAAAACTGCTCTATCAAGAG…
lincRNA-BC307	Chr.2	72404494	72406191	1697	-	104.239	11.7122	CAGTGATGAACCACCTTTCATCCATGGCTCTAAAGCTTAGGTCTGGGGCTTAGGAACCATAAAAAGTGGGTATCTGGCGCTGGGAGGTAGAGTGAGTAAGCAAAAGGATACTAAAATATGTCCTGTTCACTCTTGGATGCCCATTCACCACATAGATGAGGCTGATTCTTCTCAATACAAGGAAAGGGCATGGCAAACATTACTATTTAGTACACTAAGGGCAGCTCTGGAGGGTCATCTCCTCAGTCTGCTGACTTTCACTGGCTTGTGAACAAGCATGGCATATGGCAAGATGACAGCTTCATTCCAATCCCCCAAGAATGGCGGTTTCTTTAGCCTGATCTAACCCCAGGCTTTTATTGCAATTTTTTCTAGGGCAGGATACAGCTAAGTAGACAG…
lincRNA-BC2001	Chr.14	19529350	19531353	2003	+	103.958	11.6807	GGGGTACGCCTGCAGGTTCACTTCACTACATGGCTATACAGTAGAATTTTGATGCTTGAGGTCCTAACGTACCTGTCGTCCAGGCAGTGAACACAGCACCAGTTGGGTCTTTCTTCCTCCAAGGCTCCCTGTCTCCCTTCTTTTTCTGTCTGGTAGTACCCAACGTCTGTTGATTTCATATTGATGTTGATGTGCATTGGGTGTTGAGCTTCCACTTATAAATGAGAACCTGCAGTGTTTGGTCTTCTGTTCTTGCCTCAGTTGCTTAGCAGAGTGGCCTCCAGTTCCACCCATGTTCCTACTGAGGGCATGATTTTGTTTCTGTGTTTGATTTTCCTTAGTGGTTTTTTCAGCATTCTGTGATGTATAGGTACCACATTTTAAAAAATCCAATTTTCT…
lincRNA-BC72	Chr.X	118797445	118797669	224	-	100.959	11.3437	CAGACCATAATTTATCCTTTTGCTTTTCAGGAGAGACAGGTTTGGGCAAGTCCACCCTCATGGACACCCTGTTCAACACCAAATTCGAAGGGGAGCCAGCCACCCACACACAGCCGGGTGTCCAGCTCCAGTCTAATACCTATGACCTCCAAGAGAGCAACGTGAGGCTAAAGCTCACGATCGTTAGCACAGTTGGCTTTGGGGACCAGATCAACAAAGAGGACA
lincRNA-BC28	Chr.X	114962592	114962811	219	+	99.9138	11.2263	GTTGTTTAAAATGCCAGCGGAAAGTCCATGGGGGTGAAAGAGTCCGGCAATGGCCAGGGAGTTAGCAGCTTGGCGTAGTGTCTTCCCACTGTTTTGTCTGTCTTGAGAATAGCATTCAACGCGACTGTGTTCCCGCAGCAGACGTTAGGCCGCTGCCCACGCCTTGAGTGCCGGACGAGGTCAACATAGGCTTTCCGTCACAGAATATGTTTGGGCAGGA
lincRNA-BC402	Chr.8	81434838	81436032	1194	+	98.8972	11.112	TTTGAAATTGGGGAAAACACACTAGCTGGGTTAGGTACAGCTATCCTAATGGAGAAGAGTGAGCTAAATGCGTTAATTCATGTAAAGTGCTTAGAACACTGGTACATAATAGGTGCATAACACATCTTAAAGTTGTTTAATAATAGATAAGAACCAAGAGGAAAAAGAAATAAGAAAAGATGGGGGAAAGGAAGGAGAAAATAGGAAATGAAAGGATTAGGACTTGGGCATTTATATTAATACAAAATGGTGTAAACGGCCTGAATATCACTGTAGTAGTATCATACGGGGGAAAGTGTGATGGAAAATAGGTTTAAAAATCTTAATTTTTAAAACTTTAGTAAGCTTTATTTATATTTTTTAGGATTTTCTGAACATAGCATGAAGGGTTTAGATTCA…
lincRNA-BC116	Chr.5	167978707	167979488	781	-	96.6562	10.8603	ATTATCTAGTTTAAGTGTGTTGTTGCTTTAGGGTCATGGCATGCTTATGTATTTCTGTTACCATCTGACCATGGTACTATGCCAAGTTCTCTTAGGGGACCTGAATCTTTCCAGTAGACCACATTTGAGAGAGTATGAGTCAACTGGGCATAGTTCCCAACAACCCAAAATACATACGTACTTCACTGAAGCAGATCTCATGATTCCATTGACTTCATTTCTAAAATTGGACTTTGAGCAGCCAATTTCTAAGGATTAAAAAGAAACTTTAATGCATTGTAGACCTCTGTACACAGAAAAATCTTTGTAACTTTTGGGCTTAATTTTCATTCTTAAAAAATCTGGTAACTTTTTCAAATGCAACCACTGTCAGTTTGCTGTGAGGCTAGGCAAACAACA…
lincRNA-BC30	Chr.11	76509322	76509902	580	+	91.1029	10.2363	TAAGGTGACGTGAAGGAGGGAGTTCCTGCACCCTGTTCACCTCTCATCTCCCGTGGCCCTACCCCACTGTTCCTGCCACCCCAGCTCCAGCCATAGCCATGAGCATGCAGGCCCTTGCACACCTGTTCTCTTGCTCAGGCGTTACTGTGGGACCTTGCCCTTGCCCTCACCCCTGTCTCTCAACCTCCTTCCTATCCAGTAGACCTAGTTCTTGCCCGCCCGCAGAAGCTTCCTTGGCCCCTTCCACCTCCCTCCTCTGAACTGCAACAGTATTTTGTTCTTCCTTGGTGCTTCAGCTGCTATGGTACCCCAGCTCCTGTTTGCACACTTCCACTGACAGAGATCACACTTGGAGCTCATCTGGGTGGCTCTGCTGTCACCAAGTTCTTCCTTCTAACT…
lincRNA-BC423	Chr.4	49331276	49331648	372	+	90.2673	10.1424	TCATGCCTGCCTCACCCAGCTTCTCCCTCTCCCCTCCCAGAAACTCAGACCCAAGGGGCAGCTCCTCACCAGGGATGTGGAAGTACTCTACATCATCCCGCAGGGCTTCACCACTCTCACATCCATCATCAACAGAATTCCACAGCTTTACGTTTCCATTTCCTAACCAAGCAGGACAGTCACTCATGTCATTGTGTTCTCCCGTGTCCTCCTCTGGAGATTCTTCACAGTCACCTCATTCATCAATAATATACCATATGTTCTTACTGCCATCATCCAGCAGCTCACCCCCAGCCACCCATGACTCTCCTGTCTGTCCCAGCTACTCTCCAACCACGCCCACATTTCAGCGGGAGTCTGTACCCCACACCCC
lincRNA-BC55	Chr.2	92310028	92310970	942	+	89.8446	10.0949	TCAGAAACTTATTTGTGATGTGCGCCCTCAACTAACAGTGTTGAACCTTTCTTTTGATAGAGCAGTTTTGAAACACTCTTTTTGTAAAATCTGCAAGAGGATATTTGGATAGCTTTGAGGATTTCGTTGGAAACGGGATTGTCTTCATATAAACTCTAGACAGAAGCATTCTCGGAAGCTTCATTGGGATGTTTCAATTGAAGTCACAGTGTTGAACAGTCCCTTTCATAGAGCAGGTTTGAAACACTCTTTTTGTAGTATCTGGAAGTGGACATTTGGAGCGTTCTAAGGACTACGGTGAAAAAGGAAATATCTTCCAATAAAAGCTAGATAGAAGCAATGTCAGAAACTTTTTCATGATGTATCTACTCAGCCAACAGAGTTGAACCTTTCTTTTGA…
lincRNA-BC500	Chr.20	10604802	10606321	1519	+	89.7309	10.0821	GGTGTTACTTTCCCTTATAATTGTTGAAGTCGATGGGCGATTCTGCCCAACCTTAGGAGAAGACATCAGAGAGGCTCGTTGTTGCCTGTAGCTCAAGCATGTCCCAGTCCCTGCTCTTGCACCCACCTCCAGGATTTTGGTTTGGGACAGACTATAACCTAACAGGAACTCAGTGACCAGGTTCCAGTTTCCCAGTTGGAAGGCTTCGCAGGCAGTTCAAATTTCAAGATGGGAGCCTTCCCTTTACAATGTCACCCACTGTCTCCAGTGGGCTTGATGAAATGTCACATAGTGAATTGTAGCAATGACTTATTTTGGATGGACACCCGCTAAAAGTTTCCAATAACCGAATTTCACTCTAAAAGAGGAAAGAAACAATATTCAAGGTCCATTCATTCA…
